# Supplementary material
Source: publisher figshare collection journal article supplement (https://gsajournals.figshare.com/ndownloader/files/25010252)
Supplement: Supplementary file 1 [file 25010252]

## Sheet: Sheet1
Plasmid name	Source	Plasmid information	Backbone
#372	This study	hsp-16.41p::degron::dam::ama-1::unc-54 3'UTR	pCFJ151
#509	This study	hsp-16.2p::degron::dam::rpb-6::unc54 3'UTR	pCFJ151
#417	This study	hsp-16.2p::lox::mCherry::lox::degron::dam::ama-1::unc-54 3' UTR	pCFJ151
#418	This study	hsp-16.2p::lox::mCherry::lox::degron::gfp::dam::unc-54 3' UTR	pCFJ151
#434	This study	hsp-16.2p::lox::mCherry::lox::degron::dam::rbp-2::unc-54	pCFJ151
pSJ4646/#503	This study	hsp-16.2p::lox::mCherry::lox::degron::dam::rpb-6::unc-54 3'UTR	pCFJ151
pSR32	Sander Van den Heuvel Lab	pie-1p::Cre	pCFJ355
dg9	Miyabayashi 1999	unc-122p::rfp
dg353	Hostettler 2017	mNeonGreen Entry (slot2)	pDON221
dg651	Marques 2019	egl-13nls::wrmScarlet Entry (slot2)	pDON221
dg800	This study	sdf-9p::Cre::tbb-2 3'UTR	pCFJ355
dg801	This study	sdf-9p Entry (slot1)	pDONR-P4-P1R
dg802	This study	asic-1p Entry (slot1)	pDONR-P4-P1R
dg803	This study	dhs-17p Entry (slot1)	pDONR-P4-P1R
dg804	This study	mab-9p Entry (slot1)	pDONR-P4-P1R
dg805	This study	twk-39p Entry (slot1)	pDONR-P4-P1R
dg806	This study	lgc-36p Entry (slot1)	pDONR-P4-P1R
dg807	This study	F14H8.2p Entry (slot1)	pDONR-P4-P1R
dg808	This study	C06A1.3p Entry (slot1)	pDONR-P4-P1R
dg809	This study	asp-9p Entry (slot1)	pDONR-P4-P1R
dg810	This study	B0034.5p Entry (slot1)	pDONR-P4-P1R
dg811	This study	F52E1.5p Entry (slot1)	pDONR-P4-P1R
dg812	This study	T22E5.6p Entry (slot1)	pDONR-P4-P1R
dg813	This study	nlp-15p Entry (slot1)	pDONR-P4-P1R
dg814	This study	sdf-9p::mNeonGreen::unc-54 3’ UTR	pDEST-R4-R3
dg815	This study	sdf-9p::egl-13NLS::wrmScarlet::unc-54 3’ UTR	pDEST-R4-R3
dg816	This study	asic-1p::mNeonGreen::unc-54 3’ UTR	pDEST-R4-R3
dg817	This study	dhs-17p::mNeonGreen::unc-54 3’ UTR	pDEST-R4-R3
dg818	This study	mab-9p::mNeonGreen::unc-54 3’ UTR	pDEST-R4-R3
dg819	This study	twk-39p::mNeonGreen::unc-54 3’ UTR	pDEST-R4-R3
dg820	This study	lgc-36p::mNeonGreen::unc-54 3’ UTR	pDEST-R4-R3
dg821	This study	F14H8.2p::mNeonGreen::unc-54 3’ UTR	pDEST-R4-R3
dg822	This study	C06A1.3p::mNeonGreen::unc-54 3’ UTR	pDEST-R4-R3
dg823	This study	asp-9p::mNeonGreen::unc-54 3’ UTR	pDEST-R4-R3
dg824	This study	B0034.5p::mNeonGreen::unc-54 3’ UTR	pDEST-R4-R3
dg825	This study	F52E1.5p::mNeonGreen::unc-54 3’ UTR	pDEST-R4-R3
dg826	This study	T22E5.6p::mNeonGreen::unc-54 3’ UTR	pDEST-R4-R3
dg827	This study	nlp-15p::mNeonGreen::unc-54 3’ UTR	pDEST-R4-R3
pMH473	Gift from Marc Hammarlund	unc-54 3’ UTR Entry (slot3)	pDONR- P2R-P3
